# Supplementary material for: Lactobacillus reuteri NK33 and Bifidobacterium adolescentis NK98 Alleviate Escherichia coli-Induced Depression and Gut Dysbiosis in Mice
Source: PubMed Central journal article supplement (PMC9728327; doi:10.4014/jmb.2002.02058), 2020-04-29
Supplement: JMB-30-8-1222-supple.pdf [file JMB-30-8-1222-supple.pdf]

1 **[Supplement]**

2

*acillus reuteri* NK33 and *Bifidobacterium adolescentis* NK98 alleviate *Escherichia coli*-induced depression in mice by the amelioration of colitis and gut dysbiosis

5

6 **[Methods]**

7 Behavioral tasks

8 The tail suspension (TS) task was measured according to the method of Jang et al. [1]. Mice  
9 were suspended on the edge of a table 30 cm above the floor by taping 1 cm from the tail tip.  
10 Immobility time was measured for 5 min. Mice were judged to be immobile, when they did  
11 not move and hanged passively.

12 The forced swimming (FS) task was performed in a round transparent plastic jar (20 × 40  
13 cm<sup>3</sup>) containing fresh water (25°C) to a height of 25 cm [1]. Immobility time was measured  
14 during 5 min. Mice were judged to be immobile, when they remained floating in the water  
15 without struggling.

16

17 ELISA assay

18 The bloods collected from carotid artery and hippocampal and colon tissue homogenates  
19 were centrifuged at 3000 g, 4°C for 5 min and levels of corticosterone and cytokines TNF- $\alpha$   
20 and IL-6 in the resulting supernatants of tissue homogenates and corticosterone in the plasma  
21 (the supernatant of blood) were assessed using ELISA kits [1].

22

23 Microbiota pyrosequencing

24 Genomic DNA was extracted from the fresh stools of five mice (not trans-cardiacally

1 perfused with 4% paraformaldehyde for brain and colon tissue sections) using a commercial  
2 DNA isolation kit (QIAamp DNA stool mini kit), as previously reported [1]. Briefly, genomic  
3 DNA was extracted from the fresh stools of mice using a commercial DNA isolation kit  
4 (QIAamp DNA stool mini kit). Amplification of the genomic DNA was performed using  
5 barcoded primers, which targeted the V4 region of the bacterial 16S rRNA gene, described in  
6 Supplement. Sequencing for each amplicon was performed using Illumina iSeq 100 (San  
7 Diego, CA). Predictive functional genes were analyzed using the phylogenetic investigation  
8 of communities by reconstruction of unobserved states (PICRUSt) [2]. Linear discriminant  
9 analysis (LDA) analysis and cladograms were developed on family level data using LDA  
10 effect size (LefSe) on Galaxy platform (<https://huttenhower.sph.harvard.edu/galaxy/>).  
11 Pyrosequencing reads have been deposited in the NCBI's short read archive under accession  
12 number PRJNA603024.

13

14

1 [Figure]

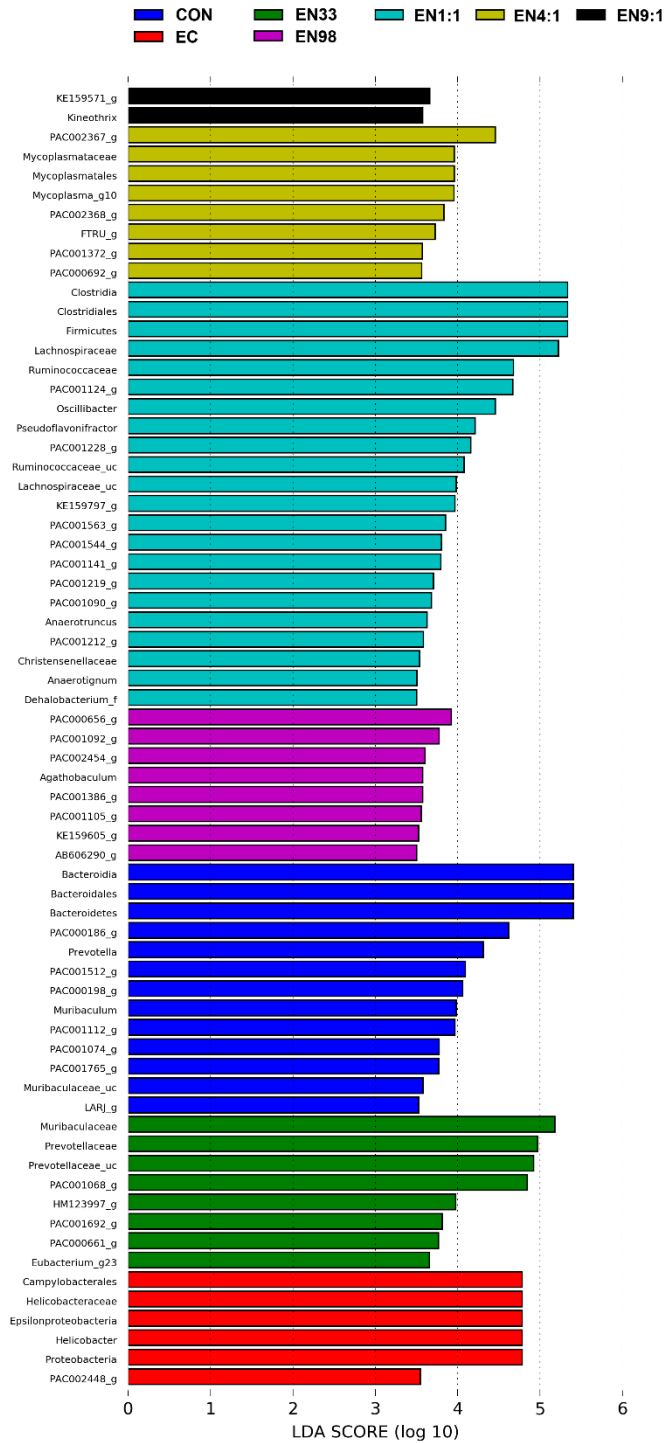

2

3 Figure S1. Effects of NK33, NK98, and their mixtures on gut microbiota composition in mice  
 4 with *Escherichia coli* K1-induced anxiety/depression. The described strains were analyzed to

1 the Linear Discriminant Analysis (LDA) along with effect size measurement (LEfSE) in  
2 Galaxy (<http://huttenhower.sph.harvard.edu/galaxy/>). It was used to discriminate significant  
3 differentially strains at each taxon level. The threshold logarithmic score set at 3.5 and  
4 ranked. Bacterial strains were described based on 16SrRNA sequencing data. CON (blue),  
5 EC (red), EN33 (purple), EN98 (green), EN1:1 (blue-green), EN4:1 (orange), and EN9:1  
6 (chartreuse) indicate groups treated with vehicle alone treated control, *Escherichia coli* K1  
7 alone, NK38 with *Escherichia coli* K1, NK98 with *Escherichia coli* K1, NK33/NK98 (1:1)  
8 mix with *Escherichia coli* K1, NK33/NK98 (4:1) mix with *Escherichia coli* K1, and  
9 NK33/NK98 (9:1) mix with *Escherichia coli* K1, respectively.

10

11 Table S3. Effects of NK33 and NK98 on the gut microbiota composition at the phylum level  
12 in mice with EC-induced depression

| Taxon Name           | AVE   |                    |                    |                   |                    |       |                   | STD  |       |      |       |       |       |       |
|----------------------|-------|--------------------|--------------------|-------------------|--------------------|-------|-------------------|------|-------|------|-------|-------|-------|-------|
|                      | CON   | EC                 | EN33               | EN98              | EN1:1              | EN4:1 | EN9:1             | CON  | EC    | EN33 | EN98  | EN1:1 | EN4:1 | EN9:1 |
| Actinobacteria       | 0.01  | 0.01               | 0.02               | 0.01              | 0.00               | 0.01  | 0.01              | 0.02 | 0.01  | 0.02 | 0.01  | 0.01  | 0.02  | 0.01  |
| Bacteroidetes        | 75.02 | 45.39 <sup>#</sup> | 68.84 <sup>*</sup> | 34.64             | 22.86              | 27.64 | 38.14             | 4.58 | 19.79 | 9.90 | 11.33 | 11.17 | 7.80  | 10.62 |
| Cyanobacteria        | 0.11  | 0.07               | 0.04               | 0.16              | 0.08               | 0.17  | 0.12              | 0.15 | 0.04  | 0.03 | 0.12  | 0.07  | 0.19  | 0.15  |
| Deferribacteres      | 0.02  | 0.89               | 0.08               | 0.73              | 0.57               | 0.46  | 1.53              | 0.02 | 1.42  | 0.05 | 0.69  | 0.80  | 0.88  | 1.32  |
| Firmicutes           | 22.46 | 38.73 <sup>#</sup> | 27.86              | 54.26             | 65.55 <sup>*</sup> | 56.00 | 50.82             | 5.04 | 13.70 | 9.86 | 9.03  | 7.55  | 10.78 | 9.64  |
| Proteobacteria       | 1.62  | 14.42 <sup>#</sup> | 2.45 <sup>*</sup>  | 8.51              | 10.39              | 12.01 | 8.23              | 1.47 | 5.33  | 0.71 | 5.44  | 4.60  | 5.10  | 2.94  |
| Saccharibacteria_TM7 | 0.00  | 0.00               | 0.00               | 0.00              | 0.00               | 0.01  | 0.00              | 0.00 | 0.00  | 0.01 | 0.00  | 0.00  | 0.01  | 0.01  |
| Tenericutes          | 0.75  | 0.37               | 0.67               | 1.69              | 0.55               | 3.62  | 1.14              | 1.12 | 0.52  | 0.45 | 1.86  | 0.60  | 7.13  | 1.18  |
| Verrucomicrobia      | 0.01  | 0.11 <sup>#</sup>  | 0.02               | 0.00 <sup>*</sup> | 0.00 <sup>*</sup>  | 0.08  | 0.01 <sup>*</sup> | 0.01 | 0.09  | 0.02 | 0.00  | 0.00  | 0.08  | 0.01  |

13 Mice were orally exposed to K1 and thereafter test agents (EC, vehicle [1% maltose]; EN33,  $1 \times 10^9$   
14 CFU/mouse/day of NK33; EN98,  $1 \times 10^9$  CFU/mouse/day of NK98; EN1:1,  $1 \times 10^9$  CFU/mouse/day of the (1:1)  
15 mixture of NK33 and NK98]; EN4:1,  $1 \times 10^9$  CFU/mouse/day of the (4:1) mixture of NK33 and NK98]; EN9:1,  
16  $1 \times 10^9$  CFU/mouse/day of the (9:1) mixture of NK33 and NK98]) were orally gavaged daily for 5 days. CON  
17 group was treated with vehicle instead of test agents and K1. <sup>#</sup> $p < 0.05$  vs. CON group. <sup>\*</sup> $p < 0.05$  vs. EC group.

18

19 Table S3. Effect of NK33 and NK98 on the gut microbiota composition at the family level in  
20 mice with EC-induced depression

| Taxon Name          | AVE   |      |                   |      |       |       |       | STD   |      |      |      |       |       |       |
|---------------------|-------|------|-------------------|------|-------|-------|-------|-------|------|------|------|-------|-------|-------|
|                     | CON   | EC   | EN33              | EN98 | EN1:1 | EN4:1 | EN9:1 | CON   | EC   | EN33 | EN98 | EN1:1 | EN4:1 | EN9:1 |
| AC160630_f          | 0.62  | 0.91 | 0.22              | 0.26 | 0.31  | 0.58  | 0.22  | 0.95  | 1.13 | 0.08 | 0.30 | 0.14  | 0.65  | 0.09  |
| Acholeplasmataceae  | 0.01  | 0.30 | 0.07              | 0.24 | 0.35  | 1.94  | 0.17  | 0.01  | 0.46 | 0.07 | 0.45 | 0.63  | 4.06  | 0.35  |
| Bacteroidaceae      | 16.62 | 9.08 | 3.94              | 4.51 | 2.63  | 6.05  | 5.19  | 14.80 | 8.63 | 1.74 | 1.41 | 2.17  | 5.62  | 3.87  |
| Christensenellaceae | 0.42  | 0.56 | 0.21 <sup>*</sup> | 0.66 | 0.82  | 0.58  | 0.53  | 0.12  | 0.30 | 0.07 | 0.31 | 0.36  | 0.35  | 0.40  |
| Deferribacteraceae  | 0.02  | 0.89 | 0.08              | 0.73 | 0.57  | 0.46  | 1.53  | 0.02  | 1.42 | 0.05 | 0.69 | 0.80  | 0.88  | 1.32  |

|                     |       |                    |                    |                    |                    |                    |       |      |       |      |      |      |       |      |
|---------------------|-------|--------------------|--------------------|--------------------|--------------------|--------------------|-------|------|-------|------|------|------|-------|------|
| Desulfovibrionaceae | 0.18  | 0.70 <sup>#</sup>  | 0.72               | 1.31               | 1.04               | 1.30               | 0.66  | 0.24 | 0.22  | 0.17 | 0.86 | 0.27 | 0.75  | 0.15 |
| Helicobacteraceae   | 0.88  | 13.47 <sup>#</sup> | 1.43 <sup>*</sup>  | 7.08               | 9.28               | 10.47              | 7.47  | 0.90 | 5.29  | 0.84 | 5.03 | 4.61 | 4.91  | 2.93 |
| Lachnospiraceae     | 12.73 | 29.52 <sup>#</sup> | 19.76              | 42.23              | 47.33 <sup>*</sup> | 43.56              | 41.54 | 2.37 | 11.77 | 9.18 | 8.89 | 4.20 | 10.31 | 9.59 |
| Lactobacillaceae    | 2.14  | 0.38               | 0.71               | 0.24               | 0.35               | 0.28               | 0.44  | 3.60 | 0.21  | 0.36 | 0.10 | 0.26 | 0.24  | 0.42 |
| Muribaculaceae      | 41.40 | 24.48 <sup>#</sup> | 39.92 <sup>*</sup> | 12.97 <sup>*</sup> | 10.57 <sup>*</sup> | 14.32              | 15.42 | 5.36 | 11.56 | 7.39 | 3.23 | 5.87 | 3.85  | 5.93 |
| Mycoplasmataceae    | 0.52  | 0.00               | 0.34               | 1.24               | 0.00               | 1.51               | 0.83  | 1.14 | 0.01  | 0.46 | 1.83 | 0.01 | 3.11  | 0.92 |
| Odoribacteraceae    | 0.80  | 1.56               | 0.82               | 0.72               | 0.86               | 0.36 <sup>*</sup>  | 1.55  | 0.95 | 0.91  | 1.52 | 1.17 | 0.58 | 0.40  | 1.75 |
| PAC000197_f         | 0.15  | 0.05               | 0.21               | 0.17               | 0.14               | 0.12               | 0.10  | 0.11 | 0.05  | 0.30 | 0.12 | 0.18 | 0.18  | 0.10 |
| Peptococcaceae      | 0.34  | 0.05               | 0.02               | 0.06               | 0.06               | 0.04               | 0.02  | 0.53 | 0.03  | 0.02 | 0.03 | 0.03 | 0.02  | 0.02 |
| Porphyromonadaceae  | 0.44  | 0.51               | 0.44               | 0.46               | 0.50               | 0.34               | 0.31  | 0.31 | 0.36  | 0.22 | 0.10 | 0.36 | 0.12  | 0.15 |
| Prevotellaceae      | 8.48  | 3.92               | 21.07 <sup>*</sup> | 11.36 <sup>*</sup> | 3.81               | 3.18               | 11.12 | 8.11 | 2.56  | 6.37 | 5.41 | 3.16 | 2.10  | 8.61 |
| Rhodospirillaceae   | 0.18  | 0.22               | 0.07               | 0.04               | 0.02 <sup>*</sup>  | 0.01 <sup>*</sup>  | 0.03  | 0.20 | 0.18  | 0.03 | 0.04 | 0.04 | 0.01  | 0.06 |
| Rikenellaceae       | 6.64  | 4.93               | 2.39               | 4.34               | 4.18               | 2.79               | 4.29  | 5.31 | 3.65  | 1.46 | 5.08 | 1.88 | 0.82  | 1.44 |
| Ruminococcaceae     | 6.48  | 7.96               | 6.66               | 10.61              | 16.54 <sup>*</sup> | 11.11 <sup>*</sup> | 7.92  | 1.22 | 2.07  | 1.82 | 2.71 | 6.05 | 1.80  | 3.78 |

1 Mice were orally exposed to K1 and thereafter test agents (EC, vehicle [1% maltose]; EN33,  $1 \times 10^9$   
2 CFU/mouse/day of NK33; EN98,  $1 \times 10^9$  CFU/mouse/day of NK98; EN1:1,  $1 \times 10^9$  CFU/mouse/day of the (1:1)  
3 mixture of NK33 and NK98]; EN4:1,  $1 \times 10^9$  CFU/mouse/day of the (4:1) mixture of NK33 and NK98]; EN9:1,  
4  $1 \times 10^9$  CFU/mouse/day of the (9:1) mixture of NK33 and NK98]) were orally gavaged daily for 5 days. CON  
5 group was treated with vehicle instead of test agents and K1. <sup>#</sup> $p < 0.05$  vs. CON group. <sup>\*</sup> $p < 0.05$  vs. EC group.

6

7 Table S3. Effect of NK33 and NK98 on the gut microbiota composition at the genus level in  
8 mice with EC-induced depression

| Taxon Name           | AVE   |                    |                    |                   |                   |                   |                   | STD   |       |      |      |       |       |       |
|----------------------|-------|--------------------|--------------------|-------------------|-------------------|-------------------|-------------------|-------|-------|------|------|-------|-------|-------|
|                      | CON   | EC                 | EN33               | EN98              | EN1:1             | EN4:1             | EN9:1             | CON   | EC    | EN33 | EN98 | EN1:1 | EN4:1 | EN9:1 |
| Acholeplasma_g2      | 0.01  | 0.30               | 0.02               | 0.23              | 0.31              | 1.93              | 0.16              | 0.01  | 0.46  | 0.05 | 0.45 | 0.65  | 4.06  | 0.35  |
| Alistipes            | 6.31  | 4.64               | 1.74               | 3.87              | 3.57              | 2.45              | 3.57              | 5.13  | 3.64  | 1.22 | 4.84 | 1.78  | 0.83  | 1.56  |
| Alloprevotella       | 0.12  | 0.34               | 0.02               | 0.02              | 0.20              | 0.01              | 1.02              | 0.25  | 0.52  | 0.04 | 0.04 | 0.30  | 0.00  | 2.27  |
| Bacteroides          | 16.05 | 9.07               | 3.94               | 4.51              | 2.62              | 6.04              | 5.18              | 14.03 | 8.62  | 1.74 | 1.42 | 2.16  | 5.60  | 3.85  |
| Helicobacter         | 0.88  | 13.44 <sup>#</sup> | 1.43 <sup>*</sup>  | 7.06              | 9.26              | 10.43             | 7.46              | 0.89  | 5.28  | 0.84 | 5.01 | 4.59  | 4.89  | 2.91  |
| KE159538_g           | 1.13  | 12.76 <sup>#</sup> | 5.61               | 9.95              | 4.30              | 11.12             | 16.61             | 0.67  | 10.53 | 6.93 | 3.09 | 1.64  | 13.65 | 17.02 |
| LLKB_g               | 0.25  | 2.39               | 0.69               | 2.42              | 2.52              | 0.99              | 3.69              | 0.23  | 3.43  | 0.93 | 1.41 | 0.64  | 0.31  | 3.41  |
| Lachnospiraceae_uc   | 0.12  | 0.43 <sup>#</sup>  | 0.20               | 0.77              | 1.91              | 1.26              | 1.04 <sup>*</sup> | 0.06  | 0.23  | 0.20 | 0.35 | 1.55  | 1.39  | 0.48  |
| Lactobacillus        | 2.13  | 0.38               | 0.71               | 0.24              | 0.35              | 0.28              | 0.44              | 3.59  | 0.21  | 0.36 | 0.10 | 0.26  | 0.24  | 0.42  |
| Oscillibacter        | 1.80  | 2.90               | 1.09               | 3.72              | 6.97 <sup>*</sup> | 4.46              | 1.87              | 1.14  | 1.73  | 0.47 | 1.31 | 3.45  | 0.78  | 0.99  |
| PAC000186_g          | 11.63 | 4.46 <sup>#</sup>  | 11.05 <sup>*</sup> | 3.67              | 3.66              | 4.77              | 3.79              | 1.70  | 2.53  | 3.29 | 1.15 | 2.22  | 1.60  | 1.57  |
| PAC000198_g          | 2.47  | 0.99               | 1.64               | 0.84              | 0.48              | 0.63              | 0.70              | 1.63  | 0.68  | 0.60 | 0.47 | 0.18  | 0.26  | 0.47  |
| PAC000664_g          | 1.36  | 3.14               | 1.82               | 4.06              | 6.36              | 2.98              | 4.57              | 0.38  | 1.77  | 0.91 | 1.38 | 4.42  | 1.87  | 2.38  |
| PAC001063_g          | 7.43  | 1.11               | 0.09 <sup>*</sup>  | 0.13              | 0.11              | 0.17              | 0.14              | 10.47 | 0.99  | 0.05 | 0.14 | 0.07  | 0.17  | 0.17  |
| PAC001066_g          | 2.25  | 0.60               | 1.03               | 0.31              | 0.35              | 0.52              | 0.50              | 2.02  | 0.32  | 1.10 | 0.18 | 0.55  | 0.37  | 0.25  |
| PAC001068_g          | 7.49  | 7.63               | 16.57 <sup>*</sup> | 3.24 <sup>*</sup> | 2.84 <sup>*</sup> | 4.45              | 5.75              | 6.72  | 3.96  | 4.99 | 0.77 | 1.76  | 1.63  | 2.00  |
| PAC001091_g          | 2.22  | 2.50               | 1.98               | 1.49              | 0.99 <sup>*</sup> | 2.82              | 0.79 <sup>*</sup> | 1.38  | 1.28  | 2.68 | 2.08 | 0.51  | 3.26  | 0.32  |
| PAC001124_g          | 0.09  | 0.00               | 1.32               | 5.19              | 8.48 <sup>*</sup> | 5.03 <sup>*</sup> | 2.58              | 0.11  | 0.01  | 2.28 | 5.62 | 6.79  | 3.99  | 3.49  |
| PAC001228_g          | 1.09  | 0.77               | 0.44               | 1.67              | 3.19 <sup>*</sup> | 1.52              | 0.98              | 0.90  | 0.97  | 0.45 | 1.53 | 1.49  | 0.61  | 0.96  |
| PAC001512_g          | 1.85  | 2.01               | 1.03               | 0.81              | 0.18 <sup>*</sup> | 0.32 <sup>*</sup> | 0.73              | 2.34  | 1.33  | 0.36 | 0.43 | 0.19  | 0.17  | 0.70  |
| PAC002367_g          | 0.87  | 0.06               | 0.63               | 1.71              | 3.59              | 5.76 <sup>*</sup> | 0.78              | 1.23  | 0.08  | 1.34 | 2.86 | 4.41  | 3.27  | 1.06  |
| Prevotellaceae_uc    | 4.65  | 0.48               | 16.43 <sup>*</sup> | 9.80 <sup>*</sup> | 3.19              | 2.13              | 7.05              | 5.80  | 0.63  | 8.00 | 5.20 | 3.31  | 1.88  | 7.64  |
| Pseudoflavonifractor | 1.58  | 3.15 <sup>#</sup>  | 1.87               | 3.47              | 5.13 <sup>*</sup> | 3.90              | 3.18              | 0.45  | 1.00  | 0.80 | 1.27 | 1.50  | 1.07  | 1.26  |

9 Mice were orally exposed to K1 and thereafter test agents (EC, vehicle [1% maltose]; EN33,  $1 \times 10^9$   
10 CFU/mouse/day of NK33; EN98,  $1 \times 10^9$  CFU/mouse/day of NK98; EN1:1,  $1 \times 10^9$  CFU/mouse/day of the (1:1)  
11 mixture of NK33 and NK98]; EN4:1,  $1 \times 10^9$  CFU/mouse/day of the (4:1) mixture of NK33 and NK98]; EN9:1,  
12  $1 \times 10^9$  CFU/mouse/day of the (9:1) mixture of NK33 and NK98]) were orally gavaged daily for 5 days. CON  
13 group was treated with vehicle instead of test agents and K1. <sup>#</sup> $p < 0.05$  vs. CON group. <sup>\*</sup> $p < 0.05$  vs. EC group.

14

1 **References**

2 [1] Jang HM, Lee KE, Lee HJ, Kim DH. 2018. Immobilization stress-induced Escherichia  
3 coli causes anxiety by inducing NF- $\kappa$ B activation through gut microbiota disturbance. *Sci.*  
4 *Rep.* 8:13897.

5 [2] Langille MG, Zaneveld J, Caporaso JG, McDonald D, Knights D, Reyes JA, Clemente  
6 JC, Burkepile DE, Vega Thurber RL, Knight R, Beiko RG, Huttenhower C. 2013.  
7 Predictive functional profiling of microbial communities using 16S rRNA marker gene  
8 sequences. *Nat. Biotechnol.* 31, 814-821.

9
